# Supplementary material for: Experimental determination of the conformational free energies (A values) of fluorinated substituents in cyclohexane by dynamic 19F NMR spectroscopy. Part 1. Description of the method for the trifluoromethyl group
Source: Royal Society of Chemistry journal article supplement (doi:10.1039/b516636e), 2006-01-01
Supplement: b516636e.pdf [file b516636e.pdf]

## Experimental determination of the conformational free energies (A Values) of fluorinated substituents in cyclohexane by dynamic $^{19}\text{F}$ NMR spectroscopy, Part 1: description of the method for the trifluoromethyl group.

Y.CARCENAC, P. DITER, C. WAKSELMAN, M. TORDEUX

SIRCOB, UMR CNRS 8086, Université de Versailles-Saint-Quentin en Yvelines, 45 Avenue des Etats-Unis, 78035 Versailles, France. E-mail : marc.tordeux@chimie.uvsq.fr

Chemical shifts must be read with one digit after the comma, but all the numbers are required and are given by the software of simulated spectra.

Table 1:  $^{19}\text{F}$  NMR chemical shifts (ppm) of 4-methyl-1-trifluoromethylcyclohexane<sup>a</sup>

| T / K | <i>trans</i> isomer <sup>b</sup> | <i>cis</i> isomer                  |                                     |                                     |
|-------|----------------------------------|------------------------------------|-------------------------------------|-------------------------------------|
|       |                                  | $\delta_{\text{obs}}$ <sup>b</sup> | $\delta_{\text{ax}}$ <sup>b,c</sup> | $\delta_{\text{eq}}$ <sup>b,c</sup> |
| 298   | <b>-71.912</b>                   | <b>-70.341</b>                     | <i>-64.402</i>                      | <i>-72.547</i>                      |
| 293   | <b>-71.902</b>                   | <b>-70.355</b>                     | <i>-64.366</i>                      | <i>-72.514</i>                      |
| 288   | <b>-71.890</b>                   | <b>-70.370</b>                     | <i>-64.329</i>                      | <i>-72.480</i>                      |
| 283   | <b>-71.878</b>                   | <b>-70.385</b>                     | <i>-64.293</i>                      | <i>-72.446</i>                      |
| 278   | <b>-71.865</b>                   | <b>-70.399</b>                     | <i>-64.256</i>                      | <i>-72.412</i>                      |
| 273   | <b>-71.851</b>                   | <b>-70.416</b>                     | <i>-64.220</i>                      | <i>-72.379</i>                      |
| 268   | <b>-71.836</b>                   | <b>-70.432</b>                     | <i>-64.183</i>                      | <i>-72.345</i>                      |
| 263   | <b>-71.820</b>                   | <b>-70.449</b>                     | <i>-64.146</i>                      | <i>-72.311</i>                      |
| 258   | <b>-71.803</b>                   | <b>-70.471</b>                     | <i>-64.110</i>                      | <i>-72.277</i>                      |
| 253   | <b>-71.785</b>                   | <b>-70.493</b>                     | <i>-64.073</i>                      | <i>-72.244</i>                      |
| 243   | <b>-71.746</b>                   | -                                  | -                                   | -                                   |
| 223   | <b>-71.657</b>                   | -                                  | -                                   | -                                   |
| 213   | <b>-71.605</b>                   | -                                  | -                                   | -                                   |
| 203   | <b>-71.548</b>                   | -                                  | <b>-63.686</b>                      | <b>-71.901</b>                      |
| 193   | <b>-71.491</b>                   | -                                  | <b>-63.635</b>                      | <b>-71.839</b>                      |
| 188   | <b>-71.460</b>                   | -                                  | <b>-63.600</b>                      | <b>-71.807</b>                      |
| 183   | <b>-71.428</b>                   | -                                  | <b>-63.562</b>                      | <b>-71.772</b>                      |
| 178   | <b>-71.393</b>                   | -                                  | <b>-63.526</b>                      | <b>-71.738</b>                      |

<sup>a</sup> Chemical shifts are in ppm and were measured in THF- $d_8$  relative to  $\text{CFCl}_3$ .

<sup>b</sup> Shifts in bold are experimental values.

<sup>c</sup> Shifts in italic were calculated by linear regression:  $\delta_{\text{ax}} = -62.224 - 7.31 \cdot 10^{-3} T$   
 $\delta_{\text{eq}} = -70.536 - 6.75 \cdot 10^{-3} T$

**Table 2: Equilibrium parameters of *cis*-4-methyl-1-trifluoromethylcyclohexane**

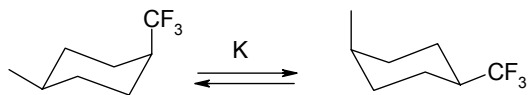

| T / K | K <sup>a</sup> | $\Delta G^\circ / \text{J.mol}^{-1}$ |
|-------|----------------|--------------------------------------|
| 298   | 2.690          | -2452                                |
| 293   | 2.775          | -2486                                |
| 288   | 2.863          | -2519                                |
| 283   | 2.956          | -2551                                |
| 278   | 3.052          | -2579                                |
| 273   | 3.157          | -2610                                |
| 268   | 3.267          | -2638                                |
| 263   | 3.383          | -2665                                |
| 258   | 3.520          | -2700                                |
| 253   | 3.666          | -2733                                |

<sup>a</sup> Equilibrium constants were calculated from the values of the chemical shifts:  $K = (\delta_{\text{ax}} - \delta_{\text{obs}}) / (\delta_{\text{obs}} - \delta_{\text{eq}})$

**Table 3:  $^{19}\text{F}$  NMR chemical shifts (ppm) of 4-ethyl-1-trifluoromethylcyclohexane<sup>a</sup>**

| T / K | <i>trans</i> isomer <sup>b</sup> | <i>cis</i> isomer                |                                   |                                   |
|-------|----------------------------------|----------------------------------|-----------------------------------|-----------------------------------|
|       |                                  | $\delta_{\text{obs}}^{\text{b}}$ | $\delta_{\text{ax}}^{\text{b,c}}$ | $\delta_{\text{eq}}^{\text{b,c}}$ |
| 298   | <b>-73.746</b>                   | <b>-72.191</b>                   | -66.227                           | -74.392                           |
| 293   | <b>-73.735</b>                   | <b>-72.214</b>                   | -66.189                           | -74.358                           |
| 288   | <b>-73.724</b>                   | <b>-72.238</b>                   | -66.151                           | -74.323                           |
| 283   | <b>-73.712</b>                   | <b>-72.261</b>                   | -66.114                           | -74.288                           |
| 278   | <b>-73.699</b>                   | <b>-72.283</b>                   | -66.076                           | -74.254                           |
| 273   | <b>-73.686</b>                   | <b>-72.304</b>                   | -66.038                           | -74.219                           |
| 268   | <b>-73.671</b>                   | <b>-72.328</b>                   | -66.000                           | -74.184                           |
| 263   | <b>-73.656</b>                   | <b>-72.355</b>                   | -65.962                           | -74.150                           |
| 258   | <b>-73.639</b>                   | <b>-72.383</b>                   | -65.925                           | -74.115                           |
| 253   | <b>-73.622</b>                   | <b>-72.412</b>                   | -65.887                           | -74.080                           |
| 248   | <b>-73.603</b>                   | <b>-72.459</b>                   | -65.849                           | -74.046                           |
| 228   | <b>-73.515</b>                   | -                                | -                                 | -                                 |
| 208   | <b>-73.411</b>                   | -                                | -                                 | -                                 |
| 198   | <b>-73.353</b>                   | -                                | -                                 | -                                 |
| 188   | <b>-73.290</b>                   | -                                | <b>-65.396</b>                    | <b>-73.635</b>                    |
| 183   | <b>-73.257</b>                   | -                                | <b>-65.358</b>                    | <b>-73.602</b>                    |
| 178   | <b>-73.223</b>                   | -                                | <b>-65.321</b>                    | <b>-73.567</b>                    |
| 173   | <b>-73.187</b>                   | -                                | <b>-65.282</b>                    | <b>-73.531</b>                    |
| 168   | <b>-73.152</b>                   | -                                | <b>-65.245</b>                    | <b>-73.496</b>                    |

<sup>a</sup> Chemical shifts are in ppm and were measured in THF- $d_8$  relative to  $\text{CFCl}_3$ .

<sup>b</sup> Shifts in bold are experimental values.

<sup>c</sup> Shifts in italic were calculated by linear regression:  $\delta_{\text{ax}} = -63.974 - 7.56 \cdot 10^{-3} T$   
 $\delta_{\text{eq}} = -72.327 - 6.93 \cdot 10^{-3} T$

**Table 4: Equilibrium parameters of *cis*-4-ethyl-1-trifluoromethylcyclohexane**

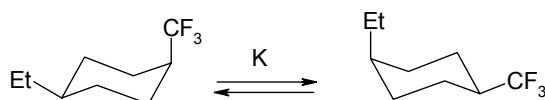

| T / K | $K^{\text{a}}$ | $\Delta G^{\circ} / \text{J} \cdot \text{mol}^{-1}$ |
|-------|----------------|-----------------------------------------------------|
| 298   | 2.710          | -2470                                               |
| 293   | 2.811          | -2518                                               |
| 288   | 2.918          | -2564                                               |
| 283   | 3.031          | -2609                                               |
| 278   | 3.149          | -2651                                               |
| 273   | 3.272          | -2691                                               |
| 268   | 3.409          | -2732                                               |
| 263   | 3.562          | -2778                                               |
| 258   | 3.730          | -2823                                               |
| 253   | 3.911          | -2869                                               |

<sup>a</sup> Equilibrium constants were calculated from the values of the chemical shifts:  $K = (\delta_{\text{ax}} - \delta_{\text{obs}}) / (\delta_{\text{obs}} - \delta_{\text{eq}})$

**Table 5:  $^{19}\text{F}$  NMR chemical shifts (ppm) of 4-cyclohexyl-1-trifluoromethylcyclohexane<sup>a</sup>**

| T / K | <i>trans</i> isomer <sup>b</sup> | <i>cis</i> isomer                |                                   |                                   |
|-------|----------------------------------|----------------------------------|-----------------------------------|-----------------------------------|
|       |                                  | $\delta_{\text{obs}}^{\text{b}}$ | $\delta_{\text{ax}}^{\text{b,c}}$ | $\delta_{\text{eq}}^{\text{b,c}}$ |
| 298   | <b>-73.788</b>                   | <b>-71.252</b>                   | <i>-66.233</i>                    | <i>-74.304</i>                    |
| 293   | <b>-73.778</b>                   | <b>-71.285</b>                   | <i>-66.195</i>                    | <i>-74.273</i>                    |
| 288   | <b>-73.768</b>                   | <b>-71.319</b>                   | <i>-66.156</i>                    | <i>-74.242</i>                    |
| 283   | <b>-73.756</b>                   | <b>-71.356</b>                   | <i>-66.118</i>                    | <i>-74.211</i>                    |
| 278   | <b>-73.744</b>                   | <b>-71.392</b>                   | <i>-66.079</i>                    | <i>-74.180</i>                    |
| 273   | <b>-73.731</b>                   | <b>-71.428</b>                   | <i>-66.041</i>                    | <i>-74.149</i>                    |
| 268   | <b>-73.717</b>                   | <b>-71.468</b>                   | <i>-66.002</i>                    | <i>-74.118</i>                    |
| 263   | <b>-73.702</b>                   | <b>-71.510</b>                   | <i>-65.964</i>                    | <i>-74.087</i>                    |
| 258   | <b>-73.686</b>                   | <b>-71.553</b>                   | <i>-65.925</i>                    | <i>-74.056</i>                    |
| 253   | <b>-73.669</b>                   | <b>-71.599</b>                   | <i>-65.887</i>                    | <i>-74.025</i>                    |
| 238   | <b>-73.613</b>                   | -                                | -                                 | -                                 |
| 223   | <b>-73.546</b>                   | -                                | -                                 | -                                 |
| 208   | <b>-73.470</b>                   | -                                | -                                 | -                                 |
| 198   | <b>-73.413</b>                   | -                                | <b><i>-65.452</i></b>             | <b><i>-73.683</i></b>             |
| 193   | <b>-73.383</b>                   | -                                | <b><i>-65.426</i></b>             | <b><i>-73.653</i></b>             |
| 188   | <b>-73.351</b>                   | -                                | <b><i>-65.389</i></b>             | <b><i>-73.624</i></b>             |
| 183   | <b>-73.321</b>                   | -                                | <b><i>-65.349</i></b>             | <b><i>-73.594</i></b>             |
| 178   | <b>-73.287</b>                   | -                                | <b><i>-65.311</i></b>             | <b><i>-73.561</i></b>             |
| 173   | <b>-73.251</b>                   | -                                | <b><i>-65.273</i></b>             | <b><i>-73.527</i></b>             |

<sup>a</sup> Chemical shifts are in ppm and were measured in THF- $d_8$  relative to  $\text{CFCl}_3$ .

<sup>b</sup> Shifts in bold are experimental values.

<sup>c</sup> Shifts in italic were calculated by linear regression:  $\delta_{\text{ax}} = -63.94 - 7.69 \cdot 10^{-3} T$   
 $\delta_{\text{eq}} = -72.46 - 6.19 \cdot 10^{-3} T$

**Table 6: Equilibrium parameters of *cis*-4-cyclohexyl-1-trifluoromethylcyclohexane**

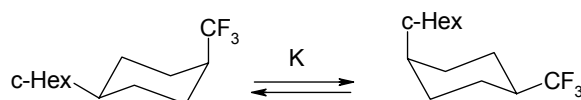

| T / K | $K^{\text{a}}$ | $\Delta G^{\circ} / \text{J} \cdot \text{mol}^{-1}$ |
|-------|----------------|-----------------------------------------------------|
| 298   | 1.645          | -1233                                               |
| 293   | 1.704          | -1298                                               |
| 288   | 1.766          | -1362                                               |
| 283   | 1.835          | -1428                                               |
| 278   | 1.906          | -1491                                               |
| 273   | 1.980          | -1550                                               |
| 268   | 2.063          | -1613                                               |
| 263   | 2.152          | -1675                                               |
| 258   | 2.248          | -1737                                               |
| 253   | 2.354          | -1801                                               |

<sup>a</sup> Equilibrium constants were calculated from the values of the chemical shifts:  $K = (\delta_{\text{ax}} - \delta_{\text{obs}}) / (\delta_{\text{obs}} - \delta_{\text{eq}})$

**Table 7:  $^{19}\text{F}$  NMR chemical shifts (ppm) of 4-isopropyl-1-trifluoromethylcyclohexane<sup>a</sup>**

| T / K | <i>trans</i> isomer <sup>b</sup> | <i>cis</i> isomer                |                                   |                                   |
|-------|----------------------------------|----------------------------------|-----------------------------------|-----------------------------------|
|       |                                  | $\delta_{\text{obs}}^{\text{b}}$ | $\delta_{\text{ax}}^{\text{b,c}}$ | $\delta_{\text{eq}}^{\text{b,c}}$ |
| 297   | <b>-73.767</b>                   | <b>-71.083</b>                   | -66.371                           | -74.457                           |
| 293   | <b>-73.760</b>                   | <b>-71.109</b>                   | -66.336                           | -74.428                           |
| 288   | <b>-73.748</b>                   | <b>-71.144</b>                   | -66.293                           | -74.392                           |
| 283   | <b>-73.737</b>                   | <b>-71.181</b>                   | -66.249                           | -74.356                           |
| 278   | <b>-73.723</b>                   | <b>-71.219</b>                   | -66.206                           | -74.320                           |
| 273   | <b>-73.710</b>                   | <b>-71.259</b>                   | -66.162                           | -74.284                           |
| 268   | <b>-73.696</b>                   | <b>-71.300</b>                   | -66.119                           | -74.248                           |
| 263   | <b>-73.680</b>                   | <b>-71.342</b>                   | -66.075                           | -74.212                           |
| 258   | <b>-73.664</b>                   | <b>-71.384</b>                   | -66.032                           | -74.177                           |
| 253   | <b>-73.647</b>                   | <b>-71.420</b>                   | -65.988                           | -74.141                           |
| 248   | <b>-73.629</b>                   | -                                | -                                 | -                                 |
| 228   | <b>-73.544</b>                   | -                                | -                                 | -                                 |
| 208   | <b>-73.443</b>                   | -                                | -                                 | -                                 |
| 198   | <b>-73.387</b>                   | -                                | -                                 | -                                 |
| 188   | <b>-73.324</b>                   | -                                | <b>-65.424</b>                    | <b>-73.674</b>                    |
| 183   | <b>-73.289</b>                   | -                                | <b>-65.381</b>                    | <b>-73.640</b>                    |
| 178   | <b>-73.251</b>                   | -                                | <b>-65.337</b>                    | <b>-73.602</b>                    |
| 173   | <b>-73.215</b>                   | -                                | <b>-65.294</b>                    | <b>-73.566</b>                    |

<sup>a</sup> Chemical shifts are in ppm and were measured in THF- $d^8$  relative to  $\text{CFCl}_3$ .

<sup>b</sup> Shifts in bold are experimental values.

<sup>c</sup> Shifts in italic were calculated by linear regression:  $\delta_{\text{ax}} = -63.79 - 8.69 \cdot 10^{-3} T$   
 $\delta_{\text{eq}} = -72.32 - 7.18 \cdot 10^{-3} T$

**Table 8: Equilibrium parameters of *cis*-4-isopropyl-1-trifluoromethylcyclohexane**

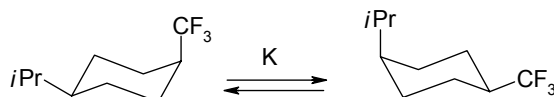

| T / K | $K^{\text{a}}$ | $\Delta G^{\circ} / \text{J} \cdot \text{mol}^{-1}$ |
|-------|----------------|-----------------------------------------------------|
| 297   | 1.397          | -8256                                               |
| 293   | 1.438          | -885                                                |
| 288   | 1.493          | -960                                                |
| 283   | 1.554          | -1036                                               |
| 278   | 1.617          | -1110                                               |
| 273   | 1.684          | -1183                                               |
| 268   | 1.758          | -1257                                               |
| 263   | 1.835          | -1327                                               |
| 258   | 1.916          | -1395                                               |
| 253   | 1.996          | -1454                                               |

<sup>a</sup> Equilibrium constants were calculated from the values of the chemical shifts:  $K = (\delta_{\text{ax}} - \delta_{\text{obs}}) / (\delta_{\text{obs}} - \delta_{\text{eq}})$

**Table 9:  $^{19}\text{F}$  NMR chemical shifts (ppm) of 4-*tert*butyl-1-trifluoromethylcyclohexane<sup>a</sup>**

| <b>T / K</b> | <b><i>trans</i> isomer</b> | <b><i>cis</i> isomer</b> |
|--------------|----------------------------|--------------------------|
| 297          | -73.785                    | -66.396                  |
| 293          | -73.777                    | -66.360                  |
| 288          | -73.766                    | -66.315                  |
| 283          | -73.754                    | -66.278                  |
| 278          | -73.741                    | -66.229                  |
| 273          | -73.728                    | -66.186                  |
| 268          | -73.714                    | -66.145                  |
| 263          | -73.697                    | -66.100                  |
| 258          | -73.681                    | -66.058                  |
| 253          | -73.664                    | -66.016                  |
| 248          | -73.646                    | -65.973                  |
| 228          | -73.560                    | -65.806                  |
| 208          | -73.458                    | -65.643                  |
| 188          | -73.337                    | -65.481                  |
| 168          | -73.198                    | -65.314                  |

<sup>a</sup> Chemical shifts are in ppm and were measured in THF- $d^8$  relative to  $\text{CFCl}_3$ .

**Table 10:**  $^{19}\text{F}$  NMR chemical shifts (ppm) of 4-phenyl-1-trifluoromethylcyclohexane<sup>a</sup>

| T / K | <i>trans</i> isomer <sup>b</sup> | <i>cis</i> isomer                  |                                     |                                     |
|-------|----------------------------------|------------------------------------|-------------------------------------|-------------------------------------|
|       |                                  | $\delta_{\text{obs}}$ <sup>b</sup> | $\delta_{\text{ax}}$ <sup>b,c</sup> | $\delta_{\text{eq}}$ <sup>b,c</sup> |
| 298   | <b>-71.832</b>                   | <b>-66.772</b>                     | -64.275                             | -72.489                             |
| 293   | <b>-71.823</b>                   | <b>-66.741</b>                     | -64.238                             | -72.459                             |
| 288   | <b>-71.813</b>                   | <b>-66.710</b>                     | -64.200                             | -72.429                             |
| 283   | <b>-71.802</b>                   | <b>-66.686</b>                     | -64.163                             | -72.399                             |
| 278   | <b>-71.791</b>                   | <b>-66.656</b>                     | -64.125                             | -72.369                             |
| 273   | <b>-71.779</b>                   | <b>-66.622</b>                     | -64.088                             | -72.339                             |
| 268   | <b>-71.768</b>                   | <b>-66.586</b>                     | -64.050                             | -72.309                             |
| 263   | <b>-71.753</b>                   | <b>-66.543</b>                     | -64.013                             | -72.279                             |
| 258   | <b>-71.739</b>                   | -                                  | -                                   | -                                   |
| 253   | <b>-71.723</b>                   | -                                  | -                                   | -                                   |
| 233   | <b>-71.648</b>                   | -                                  | -                                   | -                                   |
| 213   | <b>-71.556</b>                   | -                                  | -                                   | -                                   |
| 203   | <b>-71.503</b>                   | -                                  | -                                   | -                                   |
| 198   | <b>-71.479</b>                   | -                                  | -                                   | -                                   |
| 193   | <b>-71.460</b>                   | -                                  | <b>-63.488</b>                      | -                                   |
| 188   | <b>-71.432</b>                   | -                                  | <b>-63.452</b>                      | <b>-71.829</b>                      |
| 183   | <b>-71.402</b>                   | -                                  | <b>-63.415</b>                      | <b>-71.799</b>                      |
| 178   | <b>-71.370</b>                   | -                                  | <b>-63.376</b>                      | <b>-71.770</b>                      |
| 173   | <b>-71.338</b>                   | -                                  | <b>-63.339</b>                      | <b>-71.739</b>                      |

<sup>a</sup> Chemical shifts are in ppm and were measured in THF- $d_8$  relative to  $\text{CFCl}_3$ .

<sup>b</sup> Shifts in bold are experimental values.

<sup>c</sup> Shifts in italic were calculated by linear regression:  $\delta_{\text{ax}} = -62.04 - 7.49 \cdot 10^{-3} T$   
 $\delta_{\text{eq}} = -70.70 - 5.99 \cdot 10^{-3} T$

**Table 11:** Equilibrium parameters of *cis*-4-phenyl-1-trifluoromethylcyclohexane

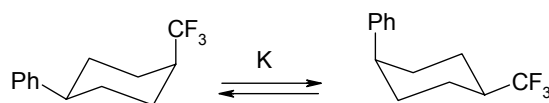

| T / K | $K^a$ | $\Delta G^\circ / \text{J}\cdot\text{mol}^{-1}$ |
|-------|-------|-------------------------------------------------|
| 298   | 0.437 | 2053                                            |
| 293   | 0.438 | 2011                                            |
| 288   | 0.439 | 1972                                            |
| 283   | 0.442 | 1923                                            |
| 278   | 0.443 | 1883                                            |
| 273   | 0.443 | 1846                                            |
| 268   | 0.443 | 1814                                            |
| 263   | 0.441 | 1790                                            |

<sup>a</sup> Equilibrium constants were calculated from the values of the chemical shifts:  $K = (\delta_{\text{ax}} - \delta_{\text{obs}}) / (\delta_{\text{obs}} - \delta_{\text{eq}})$

**Table 12:  $^{19}\text{F}$  NMR chemical shifts (ppm) of trifluoromethylcyclohexane<sup>a</sup>**

| <b>T / K</b> | <b><math>\delta_{\text{obs}}</math></b> |
|--------------|-----------------------------------------|
| 298          | -74.055                                 |
| 293          | -74.052                                 |
| 288          | -74.048                                 |
| 283          | -74.043                                 |
| 278          | -74.036                                 |
| 273          | -74.029                                 |
| 268          | -74.021                                 |
| 263          | -74.012                                 |
| 258          | -74.002                                 |
| 253          | -73.988                                 |
| 248          | -73.975                                 |
| 228          | -73.911                                 |
| 208          | -73.834                                 |
| 188          | -73.714                                 |
| 168          | -73.596                                 |

<sup>a</sup>Chemical shifts are in ppm and were measured in THF-d<sup>8</sup> relative to CFCl<sub>3</sub>.



**Table 13:  $^{19}\text{F}$  NMR chemical shifts (ppm) of 1,4-bis(trifluoromethyl)-cyclohexane<sup>a</sup>**

| T / K | <i>trans</i> isomer <sup>b</sup> | <i>cis</i> isomer                |                                   |                                   |
|-------|----------------------------------|----------------------------------|-----------------------------------|-----------------------------------|
|       |                                  | $\delta_{\text{obs}}^{\text{b}}$ | $\delta_{\text{ax}}^{\text{b,c}}$ | $\delta_{\text{eq}}^{\text{b,c}}$ |
| 297   | -73.819                          | -70.207                          | -                                 | -                                 |
| 288   | -73.798                          | -70.174                          | -                                 | -                                 |
| 278   | -73.771                          | -70.134                          | -                                 | -                                 |
| 268   | -73.741                          | -70.092                          | -                                 | -                                 |
| 258   | -73.707                          | -70.047                          | -                                 | -                                 |
| 248   | -73.669                          | -70.001                          | -                                 | -                                 |
| 228   | -73.579                          | -                                | -                                 | -                                 |
| 208   | -73.485                          | -                                | -                                 | -                                 |
| 188   | -73.362                          | -                                | -65.655                           | -73.655                           |
| 183   | -73.330                          | -                                | -65.621                           | -73.617                           |
| 178   | -73.297                          | -                                | -65.590                           | -73.582                           |
| 173   | -73.260                          | -                                | -65.553                           | -73.545                           |

<sup>a</sup> Chemical shifts are in ppm and were measured in THF- $d_8$  relative to  $\text{CFCl}_3$ .

**Table 14:  $^{19}\text{F}$  NMR chemical shifts (ppm) of 4-isopropyl-1-trifluoromethylcyclohexane in toluene- $d_8^a$**

| T / K | <i>trans</i> isomer <sup>b</sup> | <i>cis</i> isomer       |                            |                            |
|-------|----------------------------------|-------------------------|----------------------------|----------------------------|
|       |                                  | $\delta_{\text{obs}}^b$ | $\delta_{\text{ax}}^{b,c}$ | $\delta_{\text{eq}}^{b,c}$ |
| 297   | <b>-78.903</b>                   | <b>-76.272</b>          | <i>-71.810</i>             | <i>-79.418</i>             |
| 293   | <b>-78.888</b>                   | <b>-76.296</b>          | <i>-71.758</i>             | <i>-79.383</i>             |
| 288   | <b>-78.868</b>                   | <b>-76.329</b>          | <i>-71.693</i>             | <i>-79.340</i>             |
| 283   | <b>-78.847</b>                   | <b>-76.361</b>          | <i>-71.629</i>             | <i>-79.296</i>             |
| 278   | <b>-78.826</b>                   | <b>-76.395</b>          | <i>-71.565</i>             | <i>-79.252</i>             |
| 273   | <b>-78.803</b>                   | <b>-76.431</b>          | <i>-71.501</i>             | <i>-79.209</i>             |
| 268   | <b>-78.779</b>                   | <b>-76.465</b>          | <i>-71.436</i>             | <i>-79.165</i>             |
| 263   | <b>-78.753</b>                   | <b>-76.502</b>          | <i>-71.372</i>             | <i>-79.121</i>             |
| 243   | <b>-78.633</b>                   | -                       | -                          | -                          |
| 223   | <b>-78.489</b>                   | -                       | -                          | -                          |
| 203   | <b>-78.325</b>                   | -                       | <b>-70.600</b>             | <b>-78.597</b>             |
| 193   | <b>-78.235</b>                   | -                       | <b>-70.462</b>             | <b>-78.511</b>             |
| 188   | <b>-78.190</b>                   | -                       | <b>-70.409</b>             | <b>-78.465</b>             |
| 183   | <b>-78.177</b>                   | -                       | <b>-70.387</b>             | <b>-78.452</b>             |
| 178   | <b>-78.174</b>                   | -                       | <b>-70.380</b>             | <b>-78.448</b>             |

<sup>a</sup> Chemical shifts are in ppm and were measured in toluene- $d_8$  relative to  $\text{CFCl}_3$ .

<sup>b</sup> Shifts in bold are experimental values.

<sup>c</sup> Shifts in italic were calculated by linear regression:  $\delta_{\text{ax}} = -67.982 - 1.289 \cdot 10^{-2} \cdot T$   
 $\delta_{\text{eq}} = -76.823 - 8.73 \cdot 10^{-3} \cdot T$

**Table 15: Equilibrium parameters of *cis*-4-isopropyl-1-trifluoromethylcyclohexane**

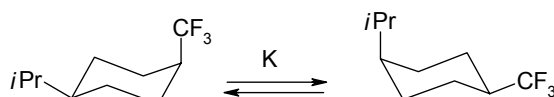

| T / K | $K^a$ | $\Delta G^\circ / \text{J} \cdot \text{mol}^{-1}$ |
|-------|-------|---------------------------------------------------|
| 297   | 1.418 | -863                                              |
| 293   | 1.470 | -939                                              |
| 288   | 1.539 | -1033                                             |
| 283   | 1.612 | -1123                                             |
| 278   | 1.691 | -1214                                             |
| 273   | 1.774 | -1302                                             |
| 268   | 1.862 | -1386                                             |
| 263   | 1.959 | -1470                                             |

<sup>a</sup> Equilibrium constants were calculated from the values of the chemical shifts:  $K = (\delta_{\text{ax}} - \delta_{\text{obs}}) / (\delta_{\text{obs}} - \delta_{\text{eq}})$

**Table 16:  $^{19}\text{F}$  NMR chemical shifts (ppm) of 4-isopropyl-1-trifluoromethylcyclohexane in methanol- $d_4^a$**

| T / K | <i>trans</i> isomer <sup>b</sup> | <i>cis</i> isomer       |                            |                            |
|-------|----------------------------------|-------------------------|----------------------------|----------------------------|
|       |                                  | $\delta_{\text{obs}}^b$ | $\delta_{\text{ax}}^{b,c}$ | $\delta_{\text{eq}}^{b,c}$ |
| 297   | <b>-71.972</b>                   | <b>-69.172</b>          | -64.518                    | -72.707                    |
| 293   | <b>-71.968</b>                   | <b>-69.225</b>          | -64.485                    | -72.678                    |
| 288   | <b>-71.962</b>                   | <b>-69.277</b>          | -64.444                    | -72.642                    |
| 283   | <b>-71.954</b>                   | <b>-69.329</b>          | -64.403                    | -72.606                    |
| 278   | <b>-71.944</b>                   | <b>-69.383</b>          | -64.361                    | -72.570                    |
| 273   | <b>-71.934</b>                   | <b>-69.434</b>          | -64.319                    | -72.534                    |
| 268   | <b>-71.922</b>                   | <b>-69.487</b>          | -64.278                    | -72.497                    |
| 263   | <b>-71.909</b>                   | <b>-69.539</b>          | -64.237                    | -72.461                    |
| 243   | <b>-71.850</b>                   | -                       | -                          | -                          |
| 223   | <b>-71.764</b>                   | -                       | -                          | -                          |
| 203   | <b>-71.647</b>                   | -                       | -                          | <b>-72.025</b>             |
| 193   | <b>-71.580</b>                   | -                       | <b>-63.655</b>             | <b>-71.956</b>             |
| 188   | <b>-71.546</b>                   | -                       | <b>-63.619</b>             | <b>-71.920</b>             |
| 183   | <b>-71.509</b>                   | -                       | <b>-63.573</b>             | <b>-71.882</b>             |
| 178   | <b>-71.470</b>                   | -                       | <b>-63.532</b>             | <b>-71.843</b>             |

<sup>a</sup> Chemical shifts are in ppm and were measured in  $\text{CD}_3\text{OD}$  relative to  $\text{CFCl}_3$ .

<sup>b</sup> Shifts in bold are experimental values.

<sup>c</sup> Shifts in italic were calculated by linear regression:  $\delta_{\text{ax}} = -62.056 - 8.29 \cdot 10^{-3} T$   
 $\delta_{\text{eq}} = -70.557 - 7.24 \cdot 10^{-3} T$

**Table 17: Equilibrium parameters of *cis*-4-isopropyl-1-trifluoromethylcyclohexane**



| T / K | $K^a$ | $\Delta G^\circ / \text{J}\cdot\text{mol}^{-1}$ |
|-------|-------|-------------------------------------------------|
| 297   | 1.316 | -679                                            |
| 293   | 1.372 | -771                                            |
| 288   | 1.436 | -867                                            |
| 283   | 1.504 | -960                                            |
| 278   | 1.576 | -1051                                           |
| 273   | 1.650 | -1137                                           |
| 268   | 1.730 | -1221                                           |
| 263   | 1.814 | -1302                                           |

<sup>a</sup> Equilibrium constants were calculated from the values of the chemical shifts:  $K = (\delta_{\text{ax}} - \delta_{\text{obs}}) / (\delta_{\text{obs}} - \delta_{\text{eq}})$

**Table 18:  $^{19}\text{F}$  NMR chemical shifts (ppm) of 4-methyl-1-trifluoromethylcyclohexanol<sup>a</sup>**

| T / K | <i>cis</i> isomer <sup>b</sup> | <i>trans</i> isomer              |                                   |                                   |
|-------|--------------------------------|----------------------------------|-----------------------------------|-----------------------------------|
|       |                                | $\delta_{\text{obs}}^{\text{b}}$ | $\delta_{\text{ax}}^{\text{b,c}}$ | $\delta_{\text{eq}}^{\text{b,c}}$ |
| 298   | <b>-84.560</b>                 | <b>-83.111</b>                   | -77.228                           | -85.300                           |
| 293   | <b>-84.555</b>                 | <b>-83.140</b>                   | -77.206                           | -85.275                           |
| 288   | <b>-84.550</b>                 | <b>-83.169</b>                   | -77.184                           | -85.250                           |
| 283   | <b>-84.545</b>                 | <b>-83.199</b>                   | -77.162                           | -85.225                           |
| 278   | <b>-84.540</b>                 | <b>-83.228</b>                   | -77.140                           | -85.201                           |
| 273   | <b>-84.533</b>                 | <b>-83.257</b>                   | -77.118                           | -85.176                           |
| 268   | <b>-84.526</b>                 | <b>-83.287</b>                   | -77.096                           | -85.151                           |
| 263   | <b>-84.519</b>                 | <b>-83.319</b>                   | -77.074                           | -85.126                           |
| 258   | <b>-84.510</b>                 | <b>-83.355</b>                   | -77.052                           | -85.102                           |
| 253   | <b>-84.500</b>                 | <b>-83.403</b>                   | -77.029                           | -85.077                           |
| 248   | <b>-84.491</b>                 | -                                | -                                 | -                                 |
| 243   | <b>-84.480</b>                 | -                                | -                                 | -                                 |
| 238   | <b>-84.467</b>                 | -                                | -                                 | -                                 |
| 233   | <b>-84.454</b>                 | -                                | -                                 | -                                 |
| 228   | <b>-84.439</b>                 | -                                | -                                 | -                                 |
| 218   | <b>-84.408</b>                 | -                                | -                                 | -                                 |
| 208   | <b>-84.373</b>                 | -                                | -                                 | -                                 |
| 203   | <b>-84.354</b>                 | -                                | -                                 | -                                 |
| 198   | <b>-84.335</b>                 | -                                | -                                 | -                                 |
| 193   | <b>-84.314</b>                 | -                                | -                                 | <b>-84.780</b>                    |
| 188   | <b>-84.292</b>                 | -                                | <b>-76.742</b>                    | <b>-84.756</b>                    |
| 183   | <b>-84.269</b>                 | -                                | <b>-76.718</b>                    | <b>-84.733</b>                    |
| 178   | <b>-84.245</b>                 | -                                | <b>-76.698</b>                    | <b>-84.707</b>                    |
| 173   | <b>-84.220</b>                 | -                                | <b>-76.675</b>                    | <b>-84.681</b>                    |
| 168   | <b>-84.208</b>                 | -                                | <b>-76.653</b>                    | <b>-84.657</b>                    |

<sup>a</sup> Chemical shifts are in ppm and were measured in THF- $d_8$  relative to  $\text{CFCl}_3$ .

<sup>b</sup> Shifts in bold are experimental values.

<sup>c</sup> Shifts in italic were calculated by linear regression:  $\delta_{\text{ax}} = -75.911 - 4.42 \cdot 10^{-3} T$   
 $\delta_{\text{eq}} = -83.825 - 4.95 \cdot 10^{-3} T$

**Table 19: Equilibrium parameters of *trans*-4-methyl-1-trifluoromethylcyclohexanol<sup>a</sup>**

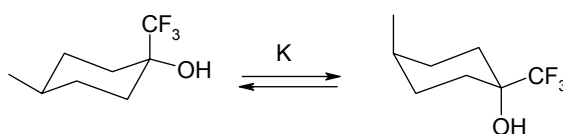

| T / K | $K^{\text{a}}$ | $\Delta G^{\circ} / \text{J} \cdot \text{mol}^{-1}$ |
|-------|----------------|-----------------------------------------------------|
| 298   | 2.688          | -2450                                               |
| 293   | 2.779          | -2490                                               |
| 288   | 2.875          | -2529                                               |
| 283   | 2.978          | -2568                                               |
| 278   | 3.0859         | -2604                                               |
| 273   | 3.198          | -2639                                               |
| 268   | 3.321          | -2674                                               |
| 263   | 3.456          | -2711                                               |
| 258   | 3.607          | -2752                                               |
| 253   | 3.806          | -2812                                               |

<sup>a</sup>  $K$  were calculated from the values of the chemical shifts:  $K = (\delta_{\text{ax}} - \delta_{\text{obs}}) / (\delta_{\text{obs}} - \delta_{\text{eq}})$

**Table 20:  $^{19}\text{F}$  NMR chemical shifts (ppm) of 4-isopropyl-1-trifluoromethylcyclohexanol<sup>a</sup>**

| T / K | <i>cis</i> isomer <sup>b</sup> | <i>trans</i> isomer              |                                   |                                   |
|-------|--------------------------------|----------------------------------|-----------------------------------|-----------------------------------|
|       |                                | $\delta_{\text{obs}}^{\text{b}}$ | $\delta_{\text{ax}}^{\text{b,c}}$ | $\delta_{\text{eq}}^{\text{b,c}}$ |
| 293   | <b>-86.413</b>                 | <b>-83.984</b>                   | <i>-79.089</i>                    | <i>-87.123</i>                    |
| 288   | <b>-86.408</b>                 | <b>-84.038</b>                   | <i>-79.064</i>                    | <i>-87.100</i>                    |
| 283   | <b>-86.402</b>                 | <b>-84.094</b>                   | <i>-79.038</i>                    | <i>-87.076</i>                    |
| 278   | <b>-86.396</b>                 | <b>-84.151</b>                   | <i>-79.013</i>                    | <i>-87.052</i>                    |
| 273   | <b>-86.388</b>                 | <b>-84.208</b>                   | <i>-78.987</i>                    | <i>-87.0277</i>                   |
| 268   | <b>-86.380</b>                 | <b>-84.268</b>                   | <i>-78.962</i>                    | <i>-87.004</i>                    |
| 263   | <b>-86.371</b>                 | <b>-84.330</b>                   | <i>-78.936</i>                    | <i>-86.980</i>                    |
| 258   | <b>-86.362</b>                 | <b>-84.391</b>                   | <i>-78.911</i>                    | <i>-86.956</i>                    |
| 253   | <b>-86.352</b>                 | <b>-84.458</b>                   | <i>-78.885</i>                    | <i>-86.932</i>                    |
| 248   | <b>-86.340</b>                 | <b>-84.523</b>                   | <i>-78.859</i>                    | <i>-86.908</i>                    |
| 243   | <b>-86.328</b>                 | -                                | -                                 | -                                 |
| 238   | <b>-86.315</b>                 | -                                | -                                 | -                                 |
| 233   | <b>-86.301</b>                 | -                                | -                                 | -                                 |
| 228   | <b>-86.286</b>                 | -                                | -                                 | -                                 |
| 218   | <b>-86.251</b>                 | -                                | -                                 | -                                 |
| 208   | <b>-86.214</b>                 | -                                | -                                 | -                                 |
| 198   | <b>-86.172</b>                 | -                                | -                                 | -                                 |
| 193   | <b>-86.150</b>                 | -                                | -                                 | <b>-86.620</b>                    |
| 188   | <b>-86.125</b>                 | -                                | <b>-78.5281</b>                   | <b>-86.598</b>                    |
| 183   | <b>-86.100</b>                 | -                                | <b>-78.5014</b>                   | <b>-86.574</b>                    |
| 178   | <b>-86.074</b>                 | -                                | <b>-78.4746</b>                   | <b>-86.550</b>                    |
| 173   | <b>-86.047</b>                 | -                                | <b>-78.4515</b>                   | <b>-86.526</b>                    |
| 168   | <b>-86.022</b>                 | -                                | <b>-78.4253</b>                   | <b>-86.500</b>                    |

<sup>a</sup> Chemical shifts are in ppm and were measured in THF- $d_8$  relative to  $\text{CFCl}_3$ .

<sup>b</sup> Shifts in bold are experimental values.

<sup>c</sup> Shifts in italic were calculated by linear regression:  $\delta_{\text{ax}} = -77.567 - 5.11 \cdot 10^{-3} T$   
 $\delta_{\text{eq}} = -85.696 - 4.79 \cdot 10^{-3} T$

**Table 21: Equilibrium parameters of *trans*-4-isopropyl-1-trifluoromethylcyclo-hexanol<sup>a</sup>**

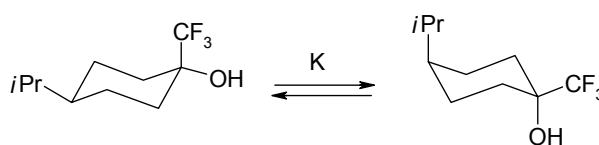

| T / K | $K^{\text{a}}$ | $\Delta G^{\circ} / \text{J} \cdot \text{mol}^{-1}$ |
|-------|----------------|-----------------------------------------------------|
| 293   | 1.579          | -1114                                               |
| 288   | 1.646          | -1194                                               |
| 283   | 1.718          | -1273                                               |
| 278   | 1.795          | -1352                                               |
| 273   | 1.877          | -1429                                               |
| 268   | 1.9667         | -1507                                               |
| 263   | 2.064          | -1584                                               |
| 258   | 2.167          | -1658                                               |
| 253   | 2.285          | -1738                                               |
| 248   | 2.409          | -1813                                               |

<sup>a</sup> Equilibrium constants were calculated from the values of the chemical shifts:  $K = (\delta_{\text{ax}} - \delta_{\text{obs}}) / (\delta_{\text{obs}} - \delta_{\text{eq}})$
